# Supplementary material
Source: MDPI journal article supplement (https://www.mdpi.com/2073-445X/12/3/585)
Supplement: s1 [file s1]

## ANNEXES

### Annex S1: Descriptive statistics of household agents (*n* = 3,744) (source: CSA-LSMS-WB, 2015)

| Variable                                  | HH     | N     | Mean     | Std. Dev. | Min | Max        |
|-------------------------------------------|--------|-------|----------|-----------|-----|------------|
| <b>Gender</b>                             |        |       |          |           |     |            |
| Labor availability                        | Total  | 3,744 | 2.59     | 1.42      | 0   | 10         |
|                                           | Female | 974   | 1.97     | 1.42      | 0   | 10         |
|                                           | Male   | 2,770 | 2.82     | 1.36      | 0   | 10         |
| Number of females per household           | Total  | 3,774 | 1.489    | 0.871     | 0   | 9          |
|                                           | Female | 974   | 1.562    | 0.882     | 1   | 9          |
| (>16 yr)                                  | Male   | 2,770 | 1.464    | 0.866     | 0   | 7          |
| Number of males per household             | Total  | 3,774 | 1.401    | 1.019     | 0   | 7          |
|                                           | Female | 974   | 0.766    | 0.943     | 0   | 4          |
| (>16 yr)                                  | Male   | 2,770 | 1.624    | 0.949     | 0   | 7          |
| Time spent on agriculture/males (hours)   | Total  | 3,136 | 23.04    | 28.68     | 0   | 258        |
|                                           | Female | 367   | 17.74    | 24.79     | 0   | 154        |
|                                           | Male   | 2,769 | 23.75    | 29.08     | 0   | 253        |
| Time spent on agriculture/females (hours) | Total  | 3,573 | 11.71    | 19.82     | 0   | 220        |
|                                           | Female | 974   | 11.90    | 19.35     | 0   | 133        |
|                                           | Male   | 2,599 | 11.64    | 19.99     | 0   | 220        |
| Household time spent harvesting (hours)   | Total  | 3,039 | 439.54   | 664.13    | 0   | 11,004     |
|                                           | Female | 652   | 270.55   | 450.10    | 0   | 5,772      |
|                                           | Male   | 2,387 | 485.71   | 704.54    | 0   | 11,004     |
| Assets last year (Birr/yr)                | Total  | 3,682 | 3,018.55 | 5,407.78  | 20  | 213,803.00 |
|                                           | Female | 930   | 2,149.66 | 3,040.32  | 20  | 56,664.00  |
|                                           | Male   | 2,752 | 3,312.18 | 5,972.21  | 20  | 213,803.00 |
| Total livestock (TLU)                     | Total  | 2,995 | 4.92     | 5.29      | 0   | 85.13      |

| Variable                                 | HH     | N     | Mean   | Std. Dev. | Min | Max    |
|------------------------------------------|--------|-------|--------|-----------|-----|--------|
| <b>Gender</b>                            |        |       |        |           |     |        |
|                                          | Female | 622   | 3.66   | 3.97      | 0   | 28.94  |
|                                          | Male   | 2,373 | 5.26   | 5.54      | 0   | 85.13  |
| Total chemical fertilizer purchased (kg) | Total  | 3,530 | 48.26  | 142.27    | 0   | 4000   |
|                                          | Female | 869   | 26.85  | 64.84     | 0   | 600    |
|                                          | Male   | 2,661 | 55.25  | 159.01    | 0   | 4000   |
| Sorghum (kg)                             | Total  | 2,980 | 229.52 | 1,367.10  | 0   | 54,300 |
|                                          | Female | 618   | 149.12 | 1,063.18  | 0   | 25,000 |
|                                          | Male   | 2,364 | 250.65 | 1,434.85  | 0   | 54,300 |
| Maize (kg)                               | Total  | 2,980 | 262.92 | 1,318.18  | 0   | 40,000 |
|                                          | Female | 618   | 144.39 | 325.59    | 0   | 3,100  |
|                                          | Male   | 2,364 | 293.79 | 1,469.11  | 0   | 40,000 |
| Teff (kg)                                | Total  | 2,980 | 127.56 | 387.44    | 0   | 10,200 |
|                                          | Female | 618   | 101.62 | 522.72    | 0   | 10,200 |
|                                          | Male   | 2,364 | 134.26 | 343.06    | 0   | 8,500  |
| Wheat (kg)                               | Total  | 2,980 | 131.26 | 802.58    | 0   | 29,900 |
|                                          | Female | 618   | 101.66 | 474.29    | 0   | 8,300  |
|                                          | Male   | 2,364 | 138.88 | 867.78    | 0   | 29,900 |
| Millet (kg)                              | Total  | 2,980 | 36.30  | 152.03    | 0   | 2,600  |
|                                          | Female | 618   | 11.28  | 65.72     | 0   | 900    |
|                                          | Male   | 2,364 | 42.81  | 166.75    | 0   | 2,600  |

Note: HH = household head

**Annex S2: Land acquisition by gender (n = 3,453)**

| HH gender                            | Type of land tenure |                             |        |          |
|--------------------------------------|---------------------|-----------------------------|--------|----------|
|                                      | Inherited           | Granted by<br>local leaders | Rented | Borrowed |
| Male-headed household<br>(n = 2,617) | 44.6%               | 32.7%                       | 8.9%   | 0.8%     |
| Female-headed household<br>(n = 836) | 40.0%               | 42.7%                       | 5.1%   | 1.6%     |

**Annex S3: Labor allocation for key activities by gender (Source: CSA-LSMS-WB, 2015)**

| Average time spent (hours per day) |                  |                               |                            |                                |
|------------------------------------|------------------|-------------------------------|----------------------------|--------------------------------|
|                                    | Water collection | Fuel (material)<br>collection | Agricultural<br>activities | Non-agricultural<br>activities |
| Male                               | 0.10             | 0.16                          | 3.26                       | 0.61                           |
| Female                             | 0.46             | 0.44                          | 1.61                       | 0.64                           |

**Annex S4: Farming type by gender (Source: CSA-LSMS-WB, 2015)**

| HH gender                            | Farm type      |                |                  |
|--------------------------------------|----------------|----------------|------------------|
|                                      | Crop only      | Livestock only | Both             |
| Male-headed household<br>(n = 2,642) | 8.0%<br>(211)  | 6.7%<br>(179)  | 85.2%<br>(2,252) |
| Female-headed<br>household (n = 874) | 18.9%<br>(165) | 11%<br>(97)    | 70%<br>(612)     |
